# Supplementary material for: Inhibition of caspase-9 aggravates acute liver injury through suppression of cytoprotective autophagy
Source: PubMed Central journal article supplement (PMC5007529; doi:10.1038/srep32447), 2016-09-01
Supplement: srep32447-s1.pdf [file srep32447-s1.pdf]

**Title:** Inhibition of caspase-9 aggravates acute liver injury through suppression of cytoprotective autophagy

**Authors:** Rui Guo<sup>1</sup>, Bin Lin\*<sup>4</sup>, Jing Fei Pan<sup>1</sup>, Emily C, Liong<sup>1</sup>, Ai Min Xu<sup>2,3</sup>, Moussa Youdim<sup>5</sup>, Man Lung Fung<sup>1,2</sup>, Kwok Fai So<sup>1,2</sup>, and George L, Tipoe\*<sup>1, 2</sup>

**Supplementary Table 1.** Primer sequences for quantitative PCR.

| Target gene   | Direction | Sequence                     |
|---------------|-----------|------------------------------|
| BAX           | Forward   | 5'-CCCGAGAGGTCTTTTCCGAG-3'   |
|               | Reverse   | 5'-CCAGCCCATGATGGTTCTGAT-3'  |
| BCL-XL        | Forward   | 5'-AGGCAGGCGACGAGTTT -3'     |
|               | Reverse   | 5'-AGAGTGAGCCCAGCAGAA-3'     |
| TNF- $\alpha$ | Forward   | 5'-GAGGCCAAGCCCTGGTATG -3'   |
|               | Reverse   | 5'-CGGGCCGATTGATCTCAGC-3'    |
| TLR4          | Forward   | 5'-AGACCTGTCCCTGAACCCTAT -3' |
|               | Reverse   | 5'-CGATGGACTTCTAAACCAGCCA-3' |
| GAPDH         | Forward   | 5'-GAAGGTGAAGGTCGGAGTCA -3'  |
|               | Reverse   | 5'-GACAAGCTTCCCGTTCTCAG -3'  |
